# Supplementary material for: Competitive adsorption mechanisms of Cd(ii), Cu(ii) and Pb(ii) on bioinspired mesoporous silica revealed by complementary adsorption/isothermal titration calorimetry studies
Source: Royal Society of Chemistry journal article supplement (doi:10.1039/d3dt03210h), 2024-01-01
Supplement: d3dt03210h1.pdf [file d3dt03210h1.pdf]

# Supporting Information for

## Competitive adsorption mechanisms of Cd(II), Cu(II) and Pb(II) on bioinspired mesoporous silica revealed by complementary adsorption/isothermal titration calorimetry studies

*Cléopée Gourmand,<sup>a</sup> Caroline Bertagnolli,<sup>a</sup> Bénédicte Prelot,<sup>b</sup> Anne Boos,<sup>a</sup> Véronique Hubscher-Bruder,<sup>a</sup> Jérémy Brandel<sup>a\*</sup>*

<sup>a</sup> Université de Strasbourg, CNRS, IPHC UMR 7178, F-67000 Strasbourg, France

<sup>b</sup> ICGM, Univ Montpellier, ENSCM, CNRS, Montpellier, France.

### Contents

|      |                                                                                                                             |   |
|------|-----------------------------------------------------------------------------------------------------------------------------|---|
| I.   | Speciation diagrams of Cd(II), Cu(II) and Pb(II) in the experimental conditions                                             | 2 |
| II.  | Adsorption isotherms for Cd(II), Cu(II) and Pb(II) on raw SBA-15                                                            | 3 |
| III. | Kinetics of Cu(II) and Pb(II) adsorption on SBA-GSH                                                                         | 4 |
| IV.  | Adsorption isotherm for Cd(II) on SBA-GSH at pH = 4                                                                         | 5 |
| V.   | Control experiment: dilution of the 0.1 M NaNO <sub>3</sub> solvent into a suspension of SBA-GSH in 0.1 M NaNO <sub>3</sub> | 5 |
| VI.  | Variations of the cumulative enthalpy of dilution for single-metal and two-metal systems                                    | 6 |

I. **Speciation diagrams of Cd(II), Cu(II) and Pb(II) in the experimental conditions**

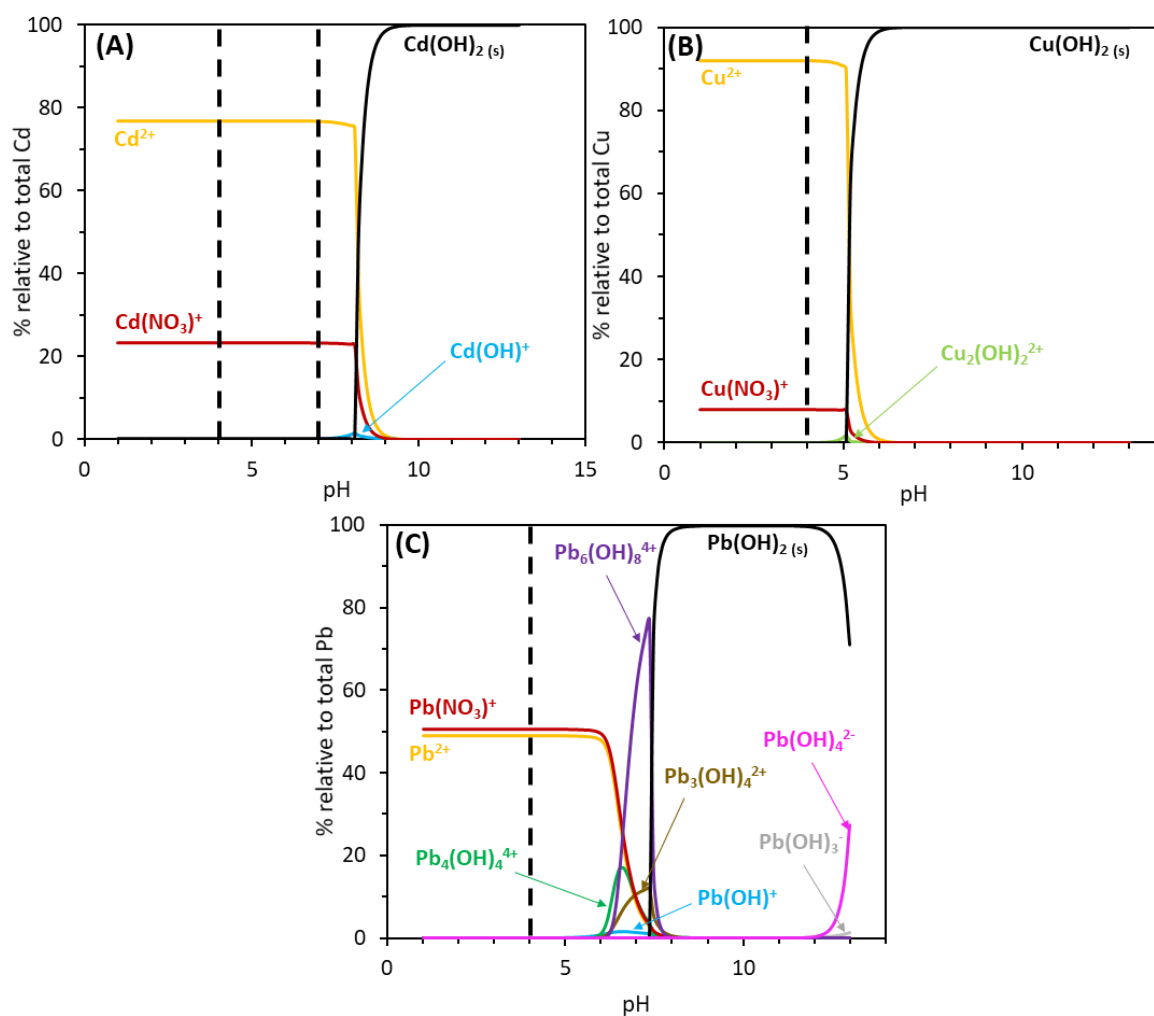

Figure S1 : Speciation diagrams of Cd(II) (A), Cu(II) (B) and Pb(II) (C) ( $[\text{M}(\text{II})] = 20 \text{ mM}$  ;  $[\text{NO}_3^-] = [\text{Na}^+] = 0.1 \text{ M}$  ;  $[\text{total carbonates}] = 1 \times 10^{-5} \text{ M}$  ; only the compounds representing at least 1% of total M(II) appear). Dashed lines are visual indicators of the pH values (4 or 7) used in this study.

## II. Adsorption isotherms for Cd(II), Cu(II) and Pb(II) on raw SBA-15

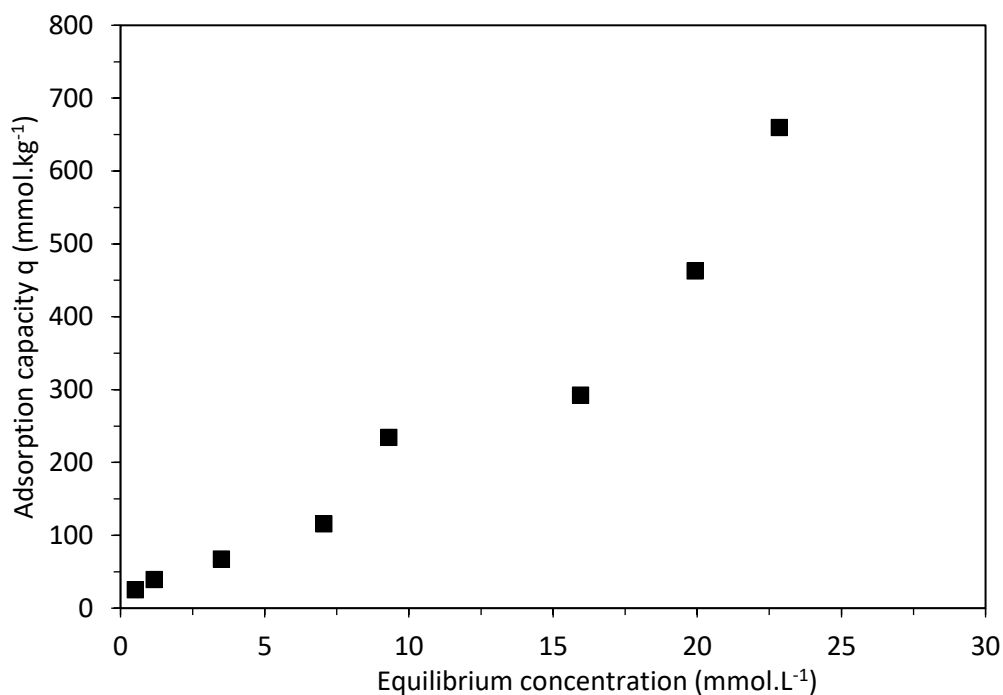

Figure S2 - Adsorption isotherms of Cd(II) on SBA-15 ( $C_0 = 0.8$  to  $27$  mmol<sub>Cd</sub>.L<sup>-1</sup>;  $10$  g.L<sup>-1</sup> SBA-15; media:  $0.1$  M NaNO<sub>3</sub>; stirring speed:  $500$  rpm;  $25 \pm 1$  °C; contact time:  $120$  min; pH:  $7$ ). Experimental error:  $6\%$ .

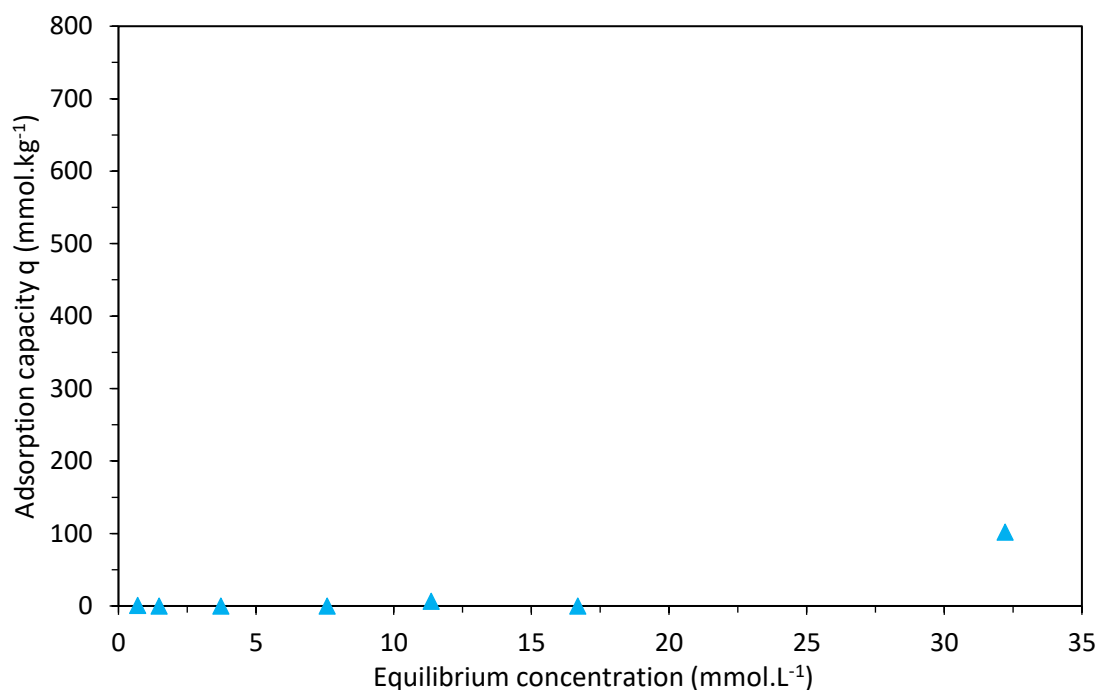

Figure S3 - Adsorption isotherms of Cu(II) on SBA-15 ( $C_0 = 0.7$  to  $33$  mmol<sub>Cu</sub>.L<sup>-1</sup>;  $10$  g.L<sup>-1</sup> SBA-15; media:  $0.1$  M NaNO<sub>3</sub>; stirring speed:  $500$  rpm;  $25 \pm 1$  °C; contact time:  $120$  min; pH:  $4$ ). Experimental error:  $4\%$ .

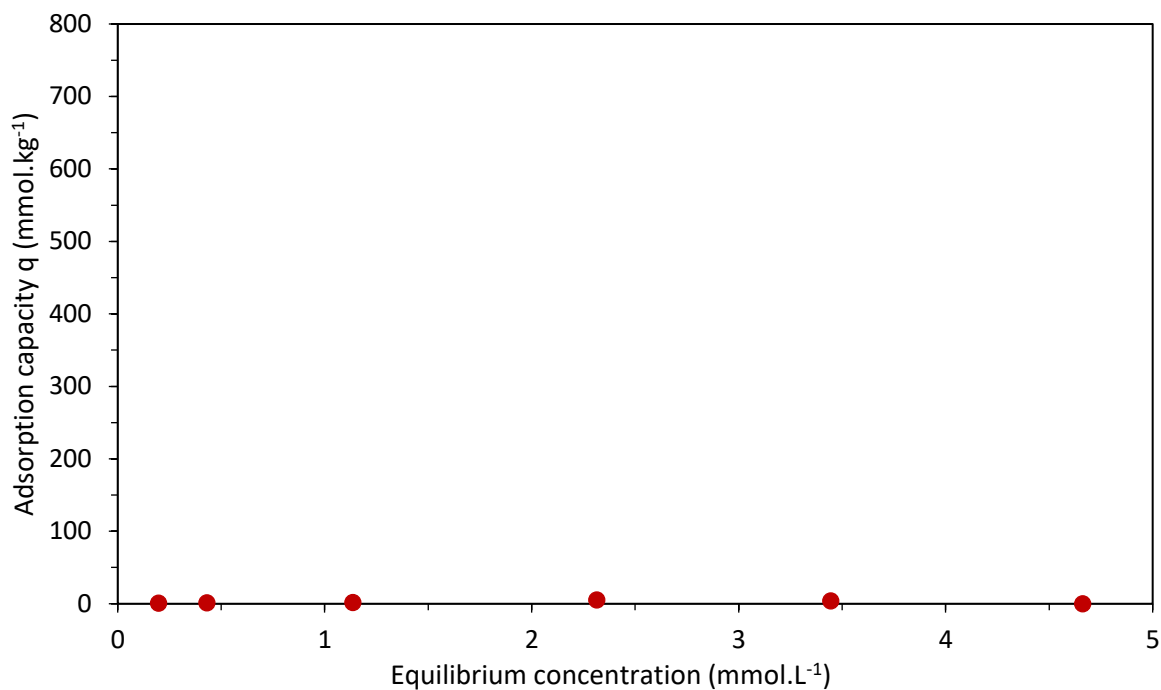

Figure S4: Adsorption isotherms of Pb(II) on SBA-15 ( $C_0 = 0.2$  to  $6 \text{ mmol}_{\text{pb}}.\text{L}^{-1}$ ;  $10 \text{ g}.\text{L}^{-1}$  SBA-15; media:  $0.1 \text{ M NaNO}_3$ ; stirring speed:  $500 \text{ rpm}$ ;  $25 \pm 1 \text{ }^\circ\text{C}$ ; contact time:  $120 \text{ min}$ ;  $\text{pH} : 4$ ). Experimental error: 4%.

### III. Kinetics of Cu(II) and Pb(II) adsorption on SBA-GSH at pH 4

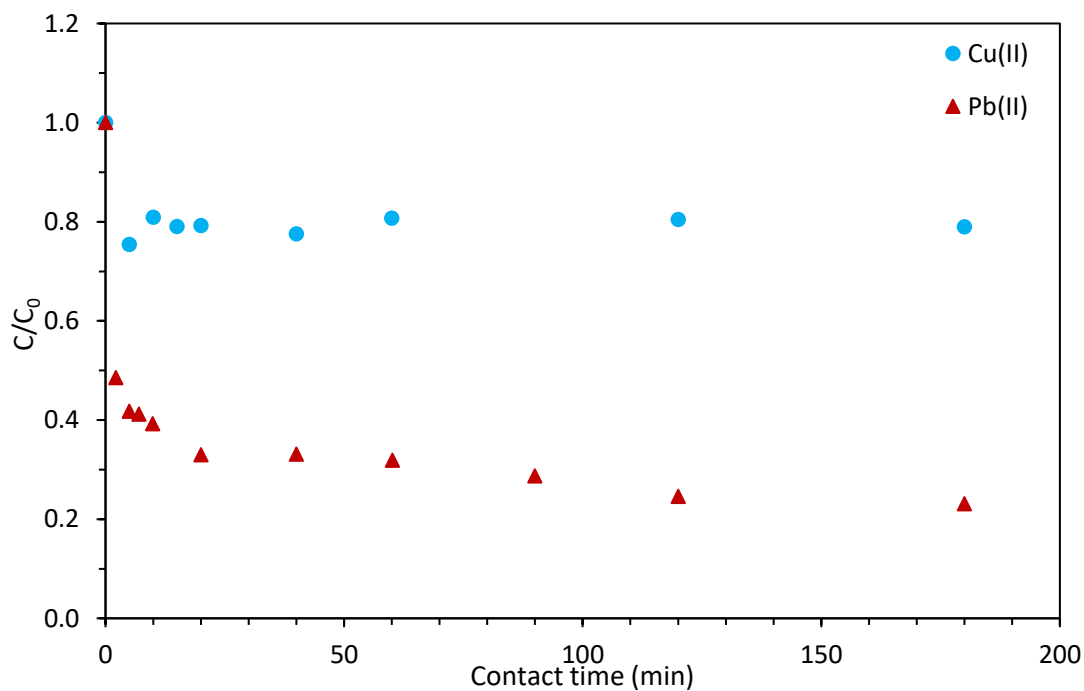

Figure S5: Cu(II) and Pb(II) adsorption kinetics on SBA-GSH ( $C_0 = 8 \text{ mmol}.\text{L}^{-1}$ ;  $10 \text{ g}.\text{L}^{-1}$  SBA-GSH; media:  $0.1 \text{ M NaNO}_3$ ; stirring speed:  $500 \text{ rpm}$ ;  $25 \pm 1 \text{ }^\circ\text{C}$ ;  $\text{pH} : 4$ ). Experimental error: 4%. Data for Cd(II) can be found in reference [40]

#### IV. Adsorption isotherm for Cd(II) on SBA-GSH at pH = 4

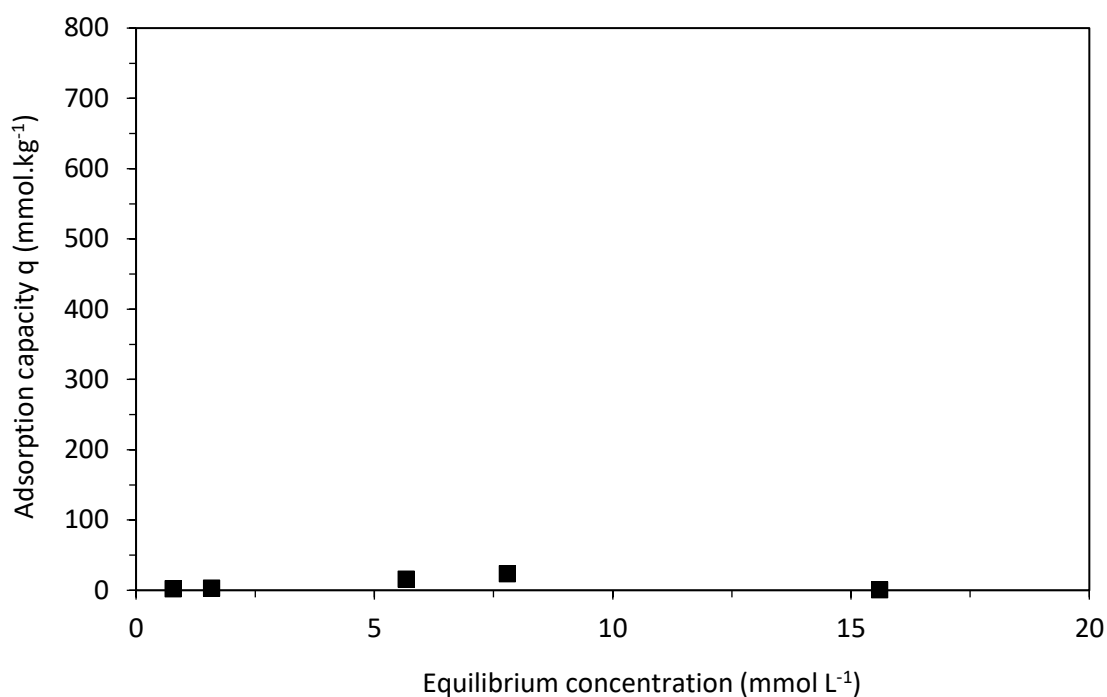

Figure S6: Adsorption isotherms of Cd(II) on SBA-GSH ( $C_0 = 0.8$  to  $16 \text{ mmol}_{\text{Cd}}.\text{L}^{-1}$ ;  $10 \text{ g}.\text{L}^{-1}$  SBA-GSH; media:  $0.1 \text{ M NaNO}_3$ ; stirring speed:  $500 \text{ rpm}$ ;  $25 \pm 1 \text{ }^\circ\text{C}$ ; contact time:  $120 \text{ min}$ ; pH: 4). Experimental error: 3%.

#### V. Control experiment: dilution of the $0.1 \text{ M NaNO}_3$ solvent into a suspension of SBA-GSH in $0.1 \text{ M NaNO}_3$

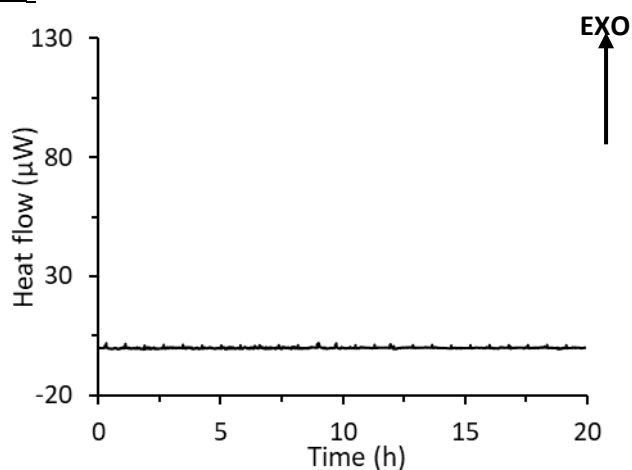

Figure S7: Thermal profile for  $0.1 \text{ M NaNO}_3$  dilution into a suspension of SBA-GSH ( $25^\circ\text{C}$ ; 25 injections of  $10 \mu\text{L}$ ; media:  $0.1 \text{ M NaNO}_3$ ; glass ampoule with a  $10 \text{ g}.\text{L}^{-1}$  suspension). EXO defines the direction of exothermic signal.

**VI. Variations of the cumulative enthalpy of dilution for single-metal and two-metal systems**

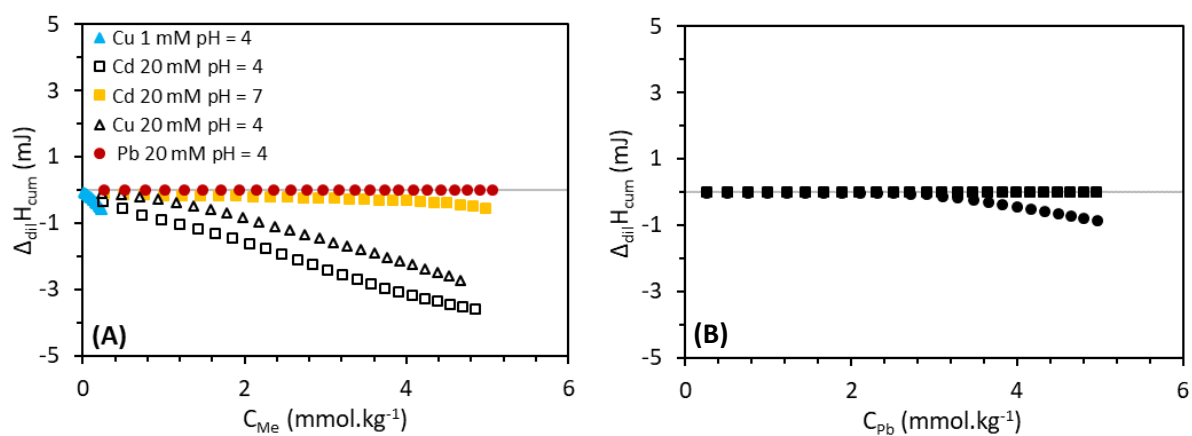

Figure S8: Variations of the cumulative enthalpy of dilution for single-metal (A) and two-metal (B) systems (25°C; 25 injections of 10  $\mu\text{L}$ ; media : 0.1 M  $\text{NaNO}_3$  ; glass ampoule with 0.1 M  $\text{NaNO}_3$ ).
